# Supplementary material for: EOAI, a ubiquitin-specific peptidase 5 inhibitor, prevents non-small cell lung cancer progression by inducing DNA damage
Source: Springer Nature journal article supplement (doi:10.1186/s12885-023-10506-0), 2023-01-07
Supplement: MOESM1 [file 23899116]

**Figure1-D**

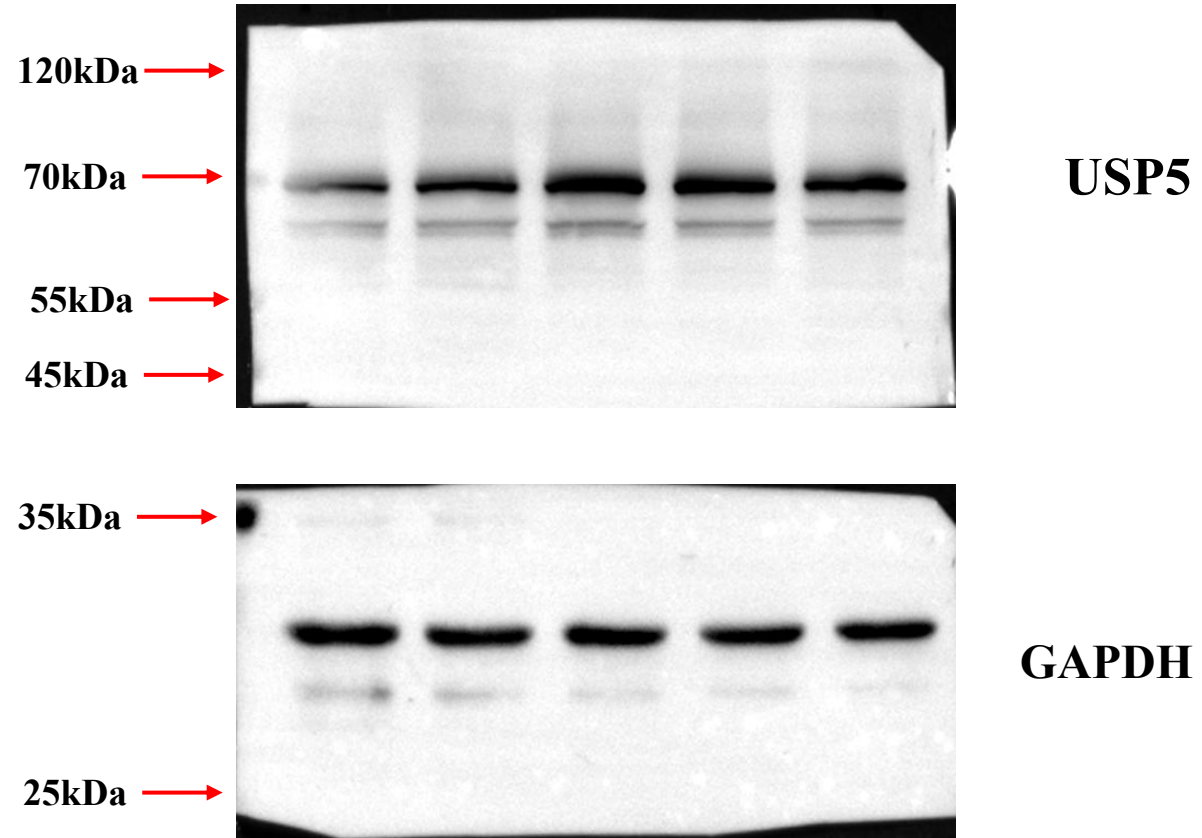

**Figure2-C**

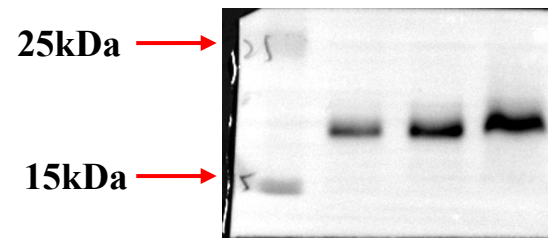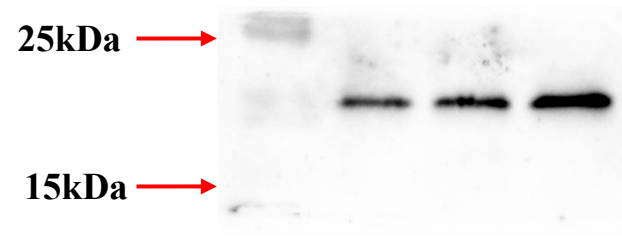

**P21**

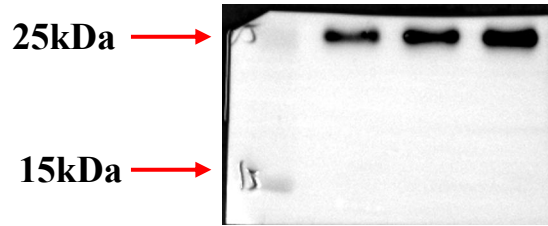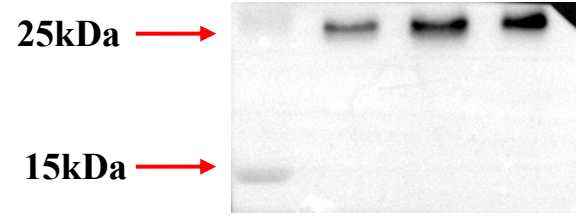

**P27**

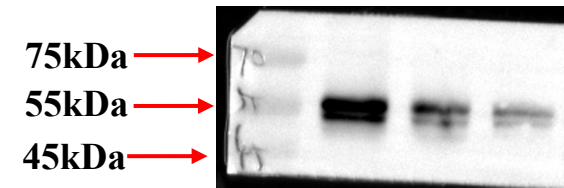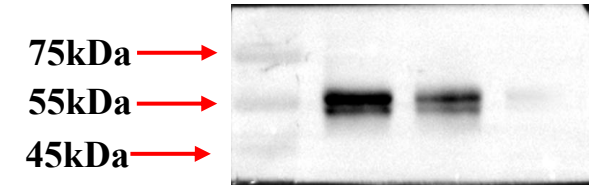

**CyclinB1**

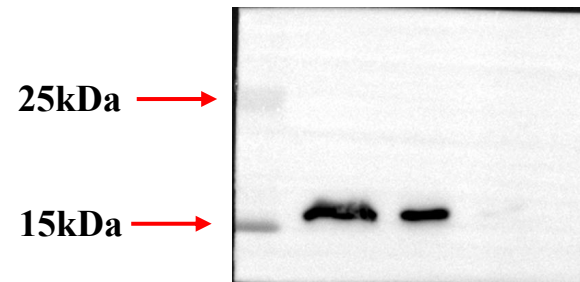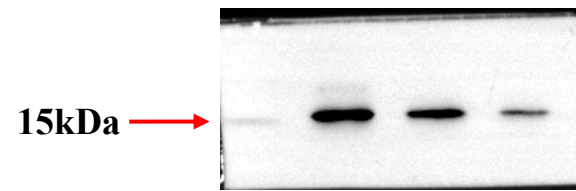

**p-H3**

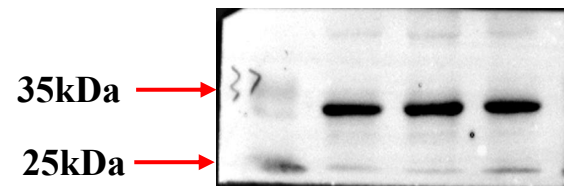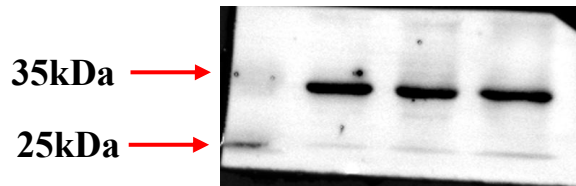

**GAPDH**

**Figure3-D**

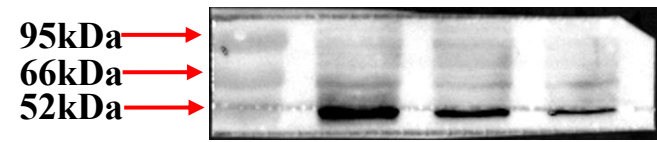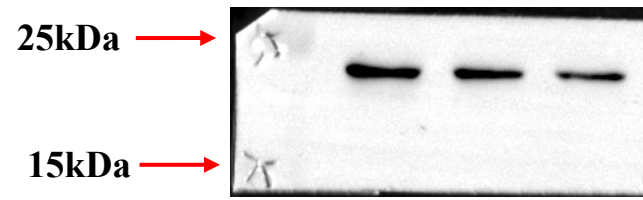

**CASP-9**

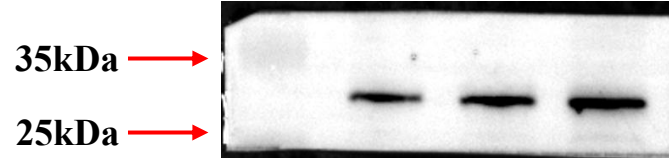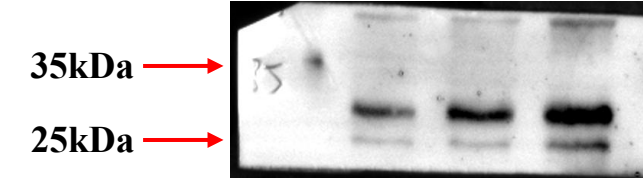

**c-CASP-9**

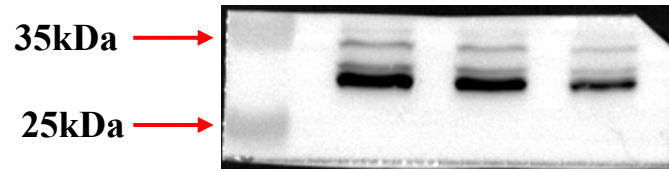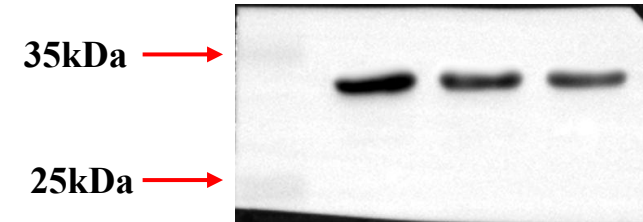

**CASP-3**

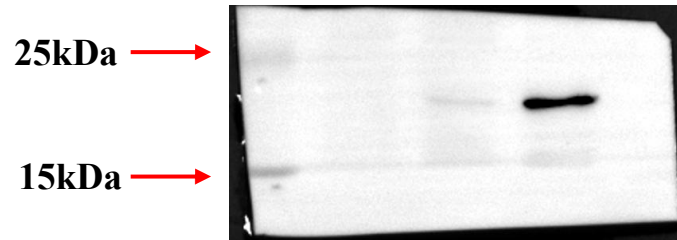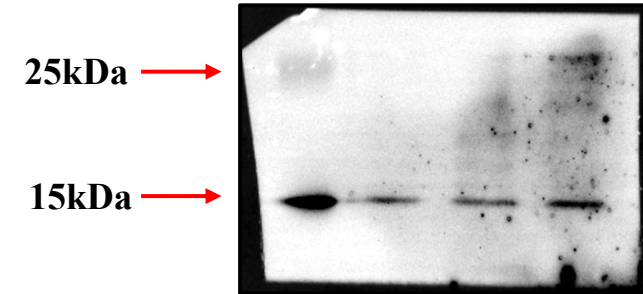

**c-CASP-3**

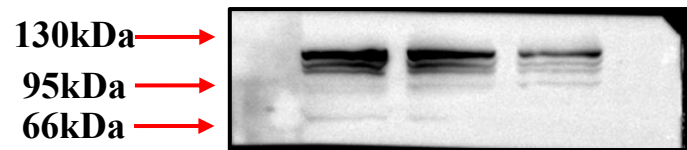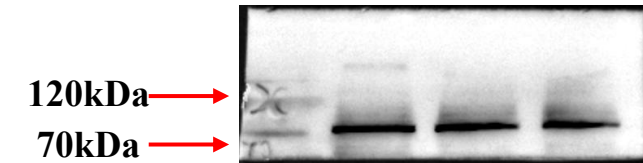

**PARP**

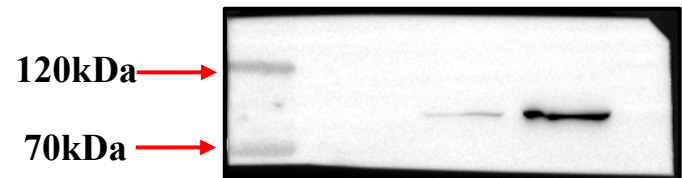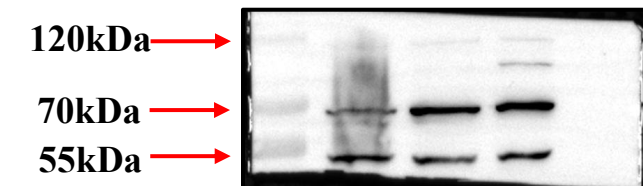

**c-PARP**

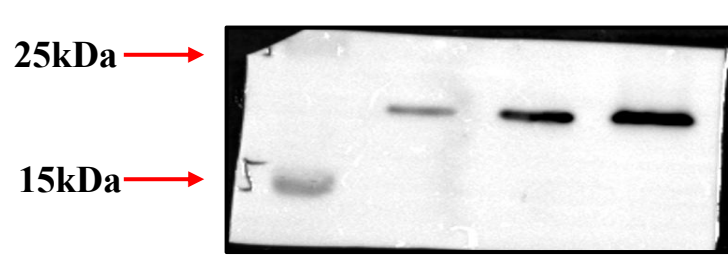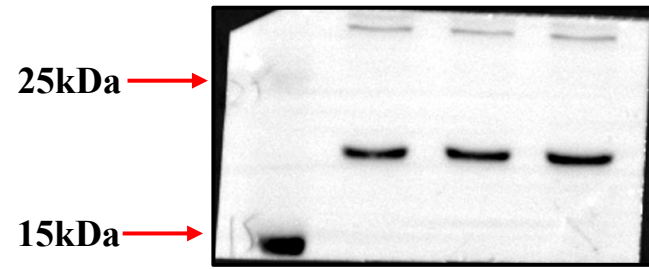

**Bak**

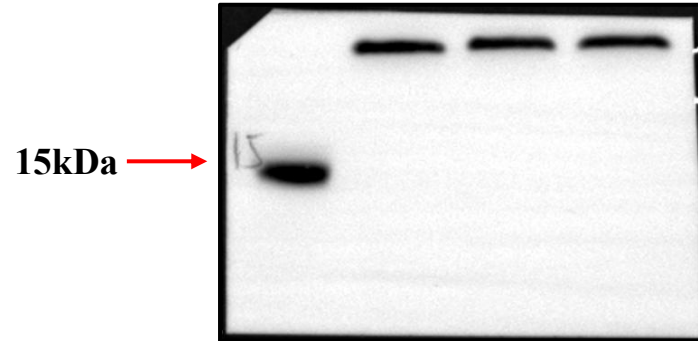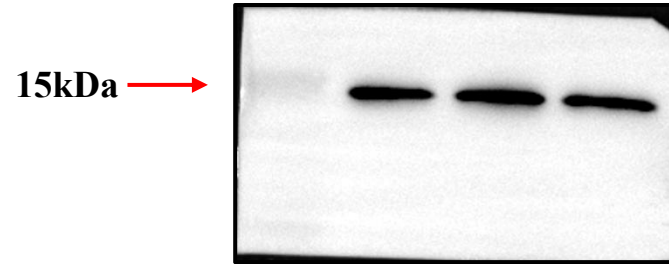

**Bax**

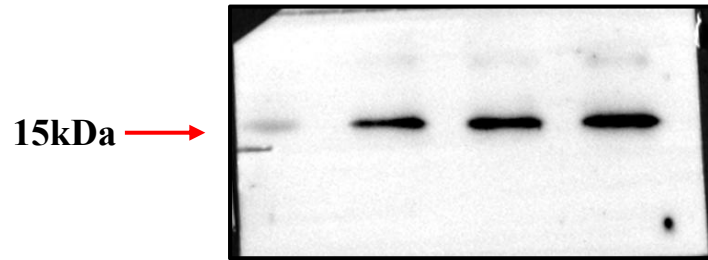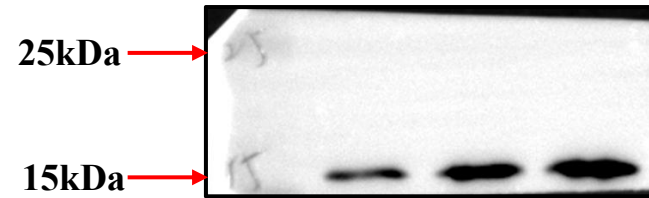

**Noxa**

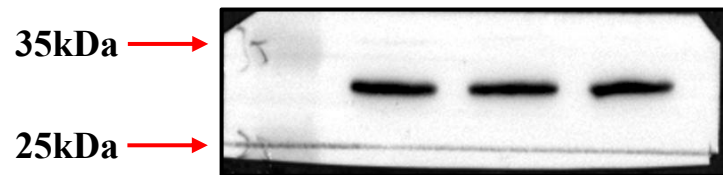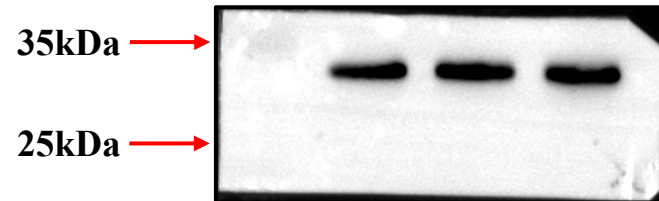

**GAPDH**

**Figure3-E**

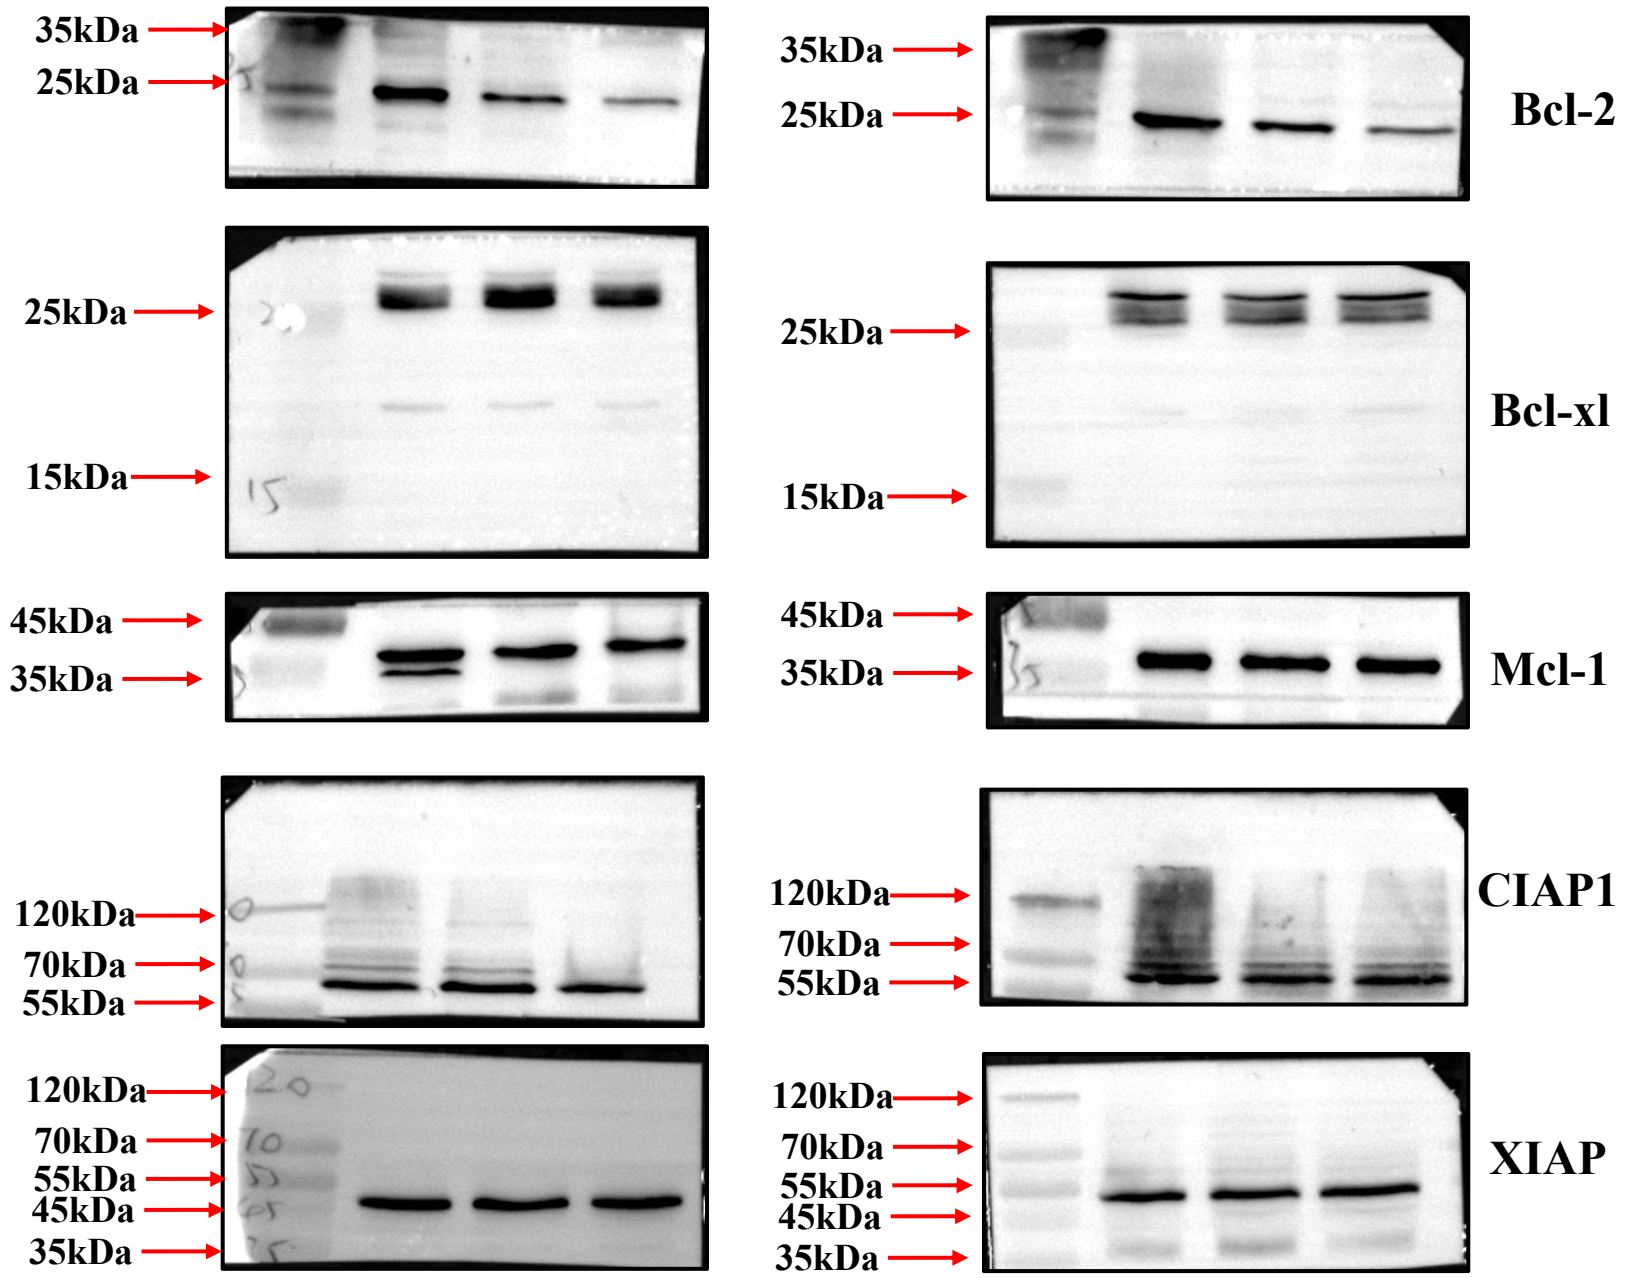

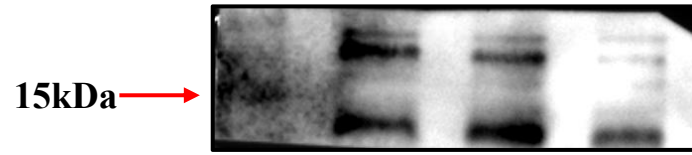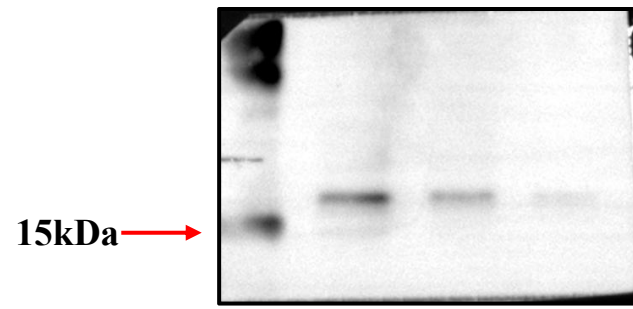

**Survivin**

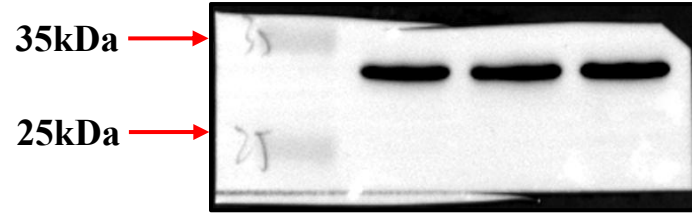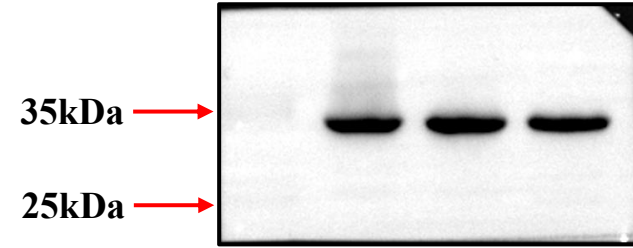

**GAPDH**

**Figure4-B**

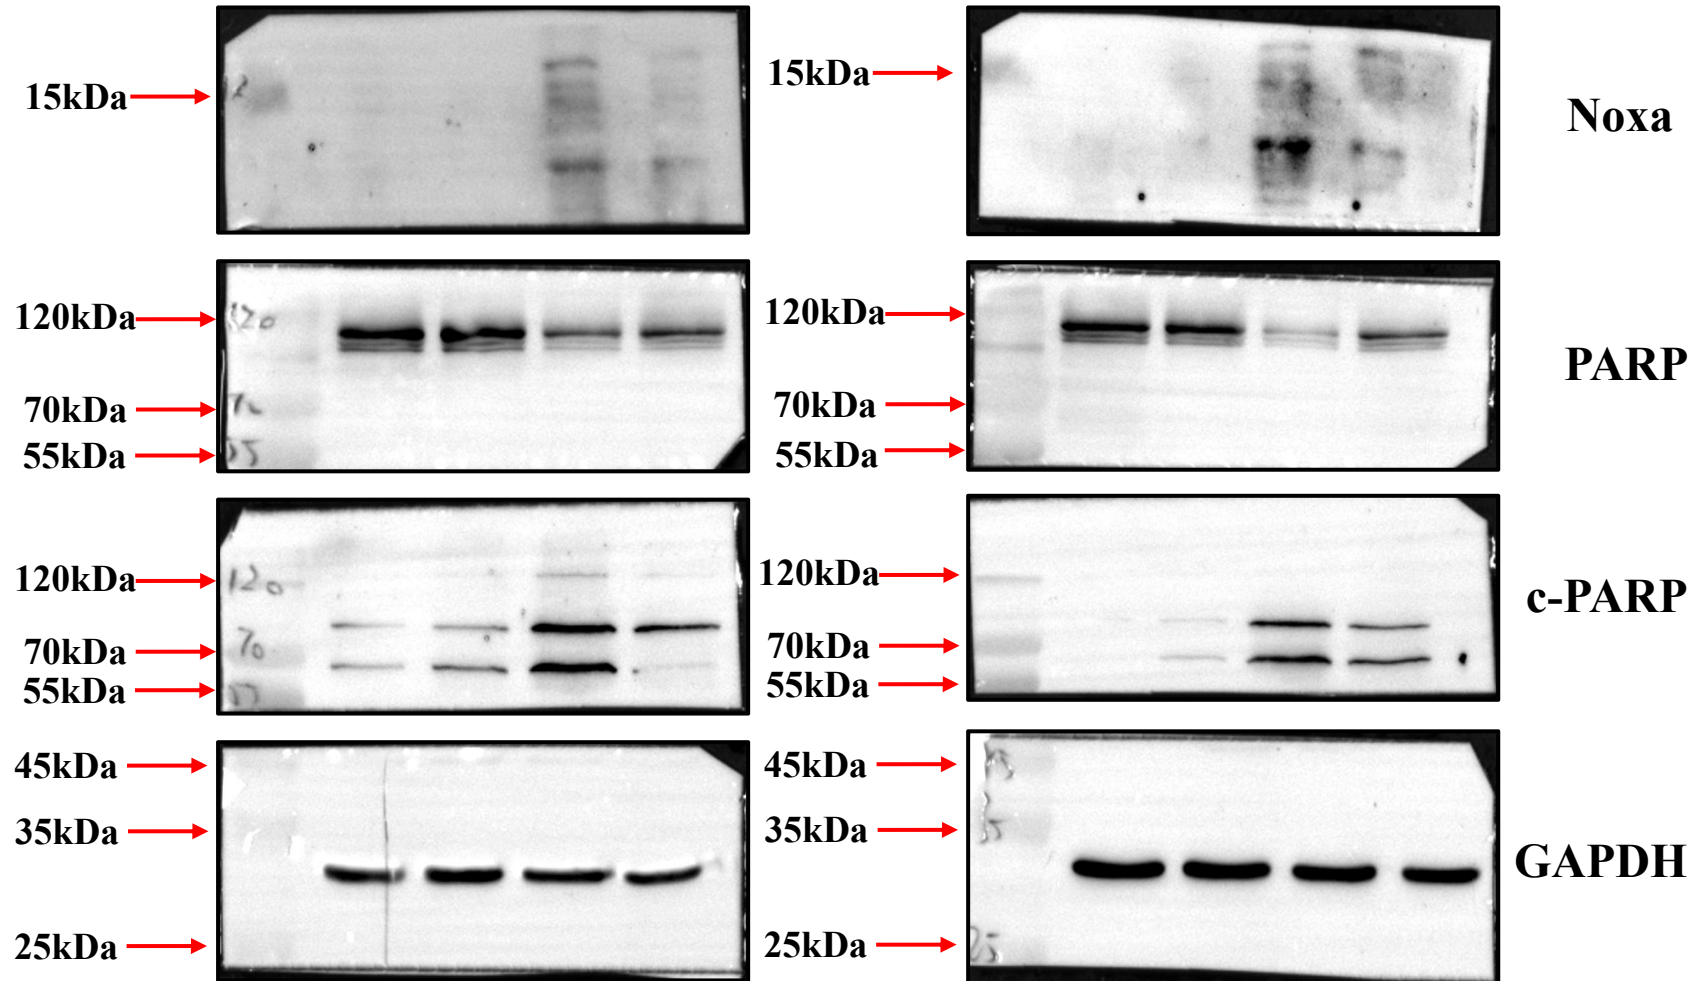

**Figure4-C**

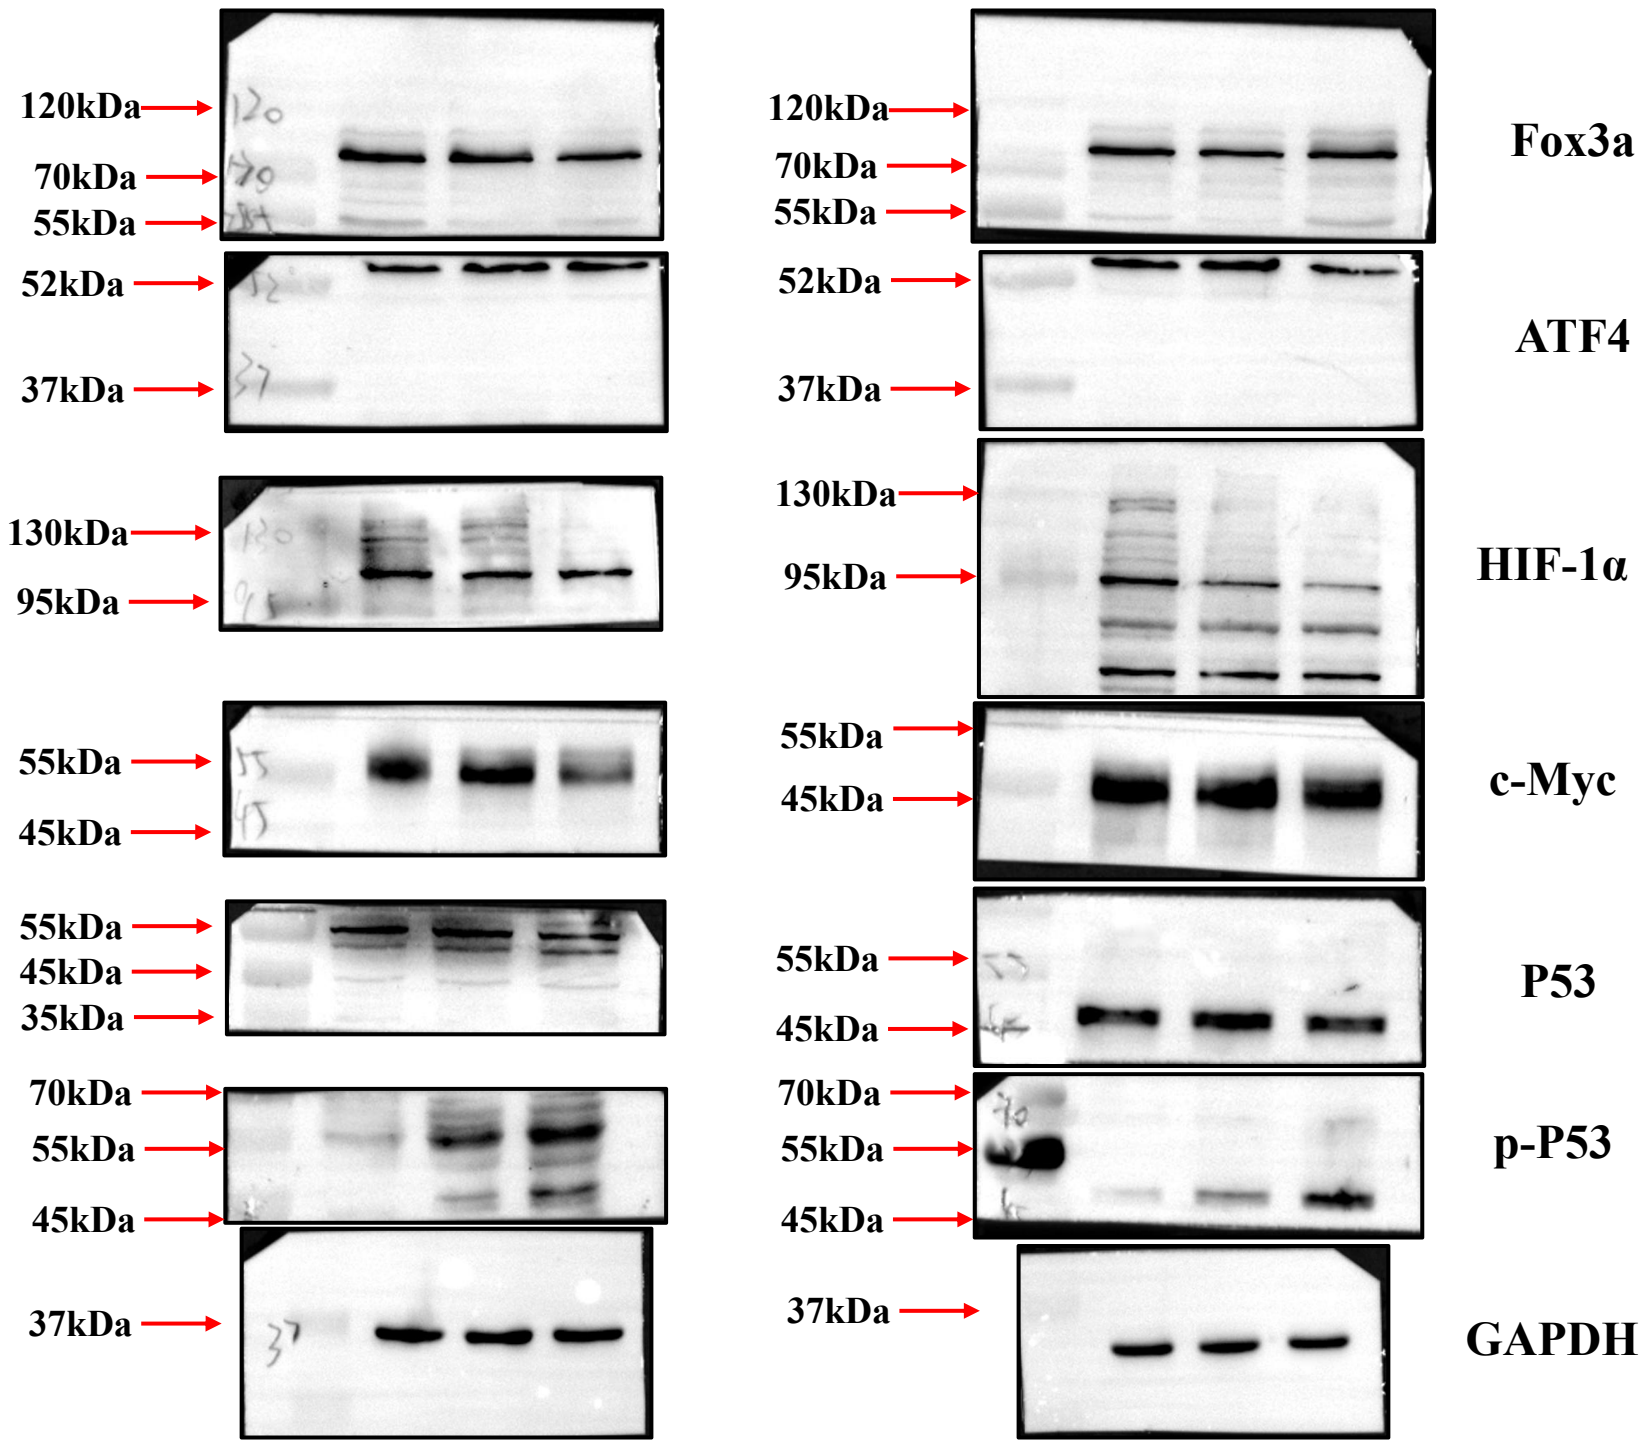



**Figure4-E**

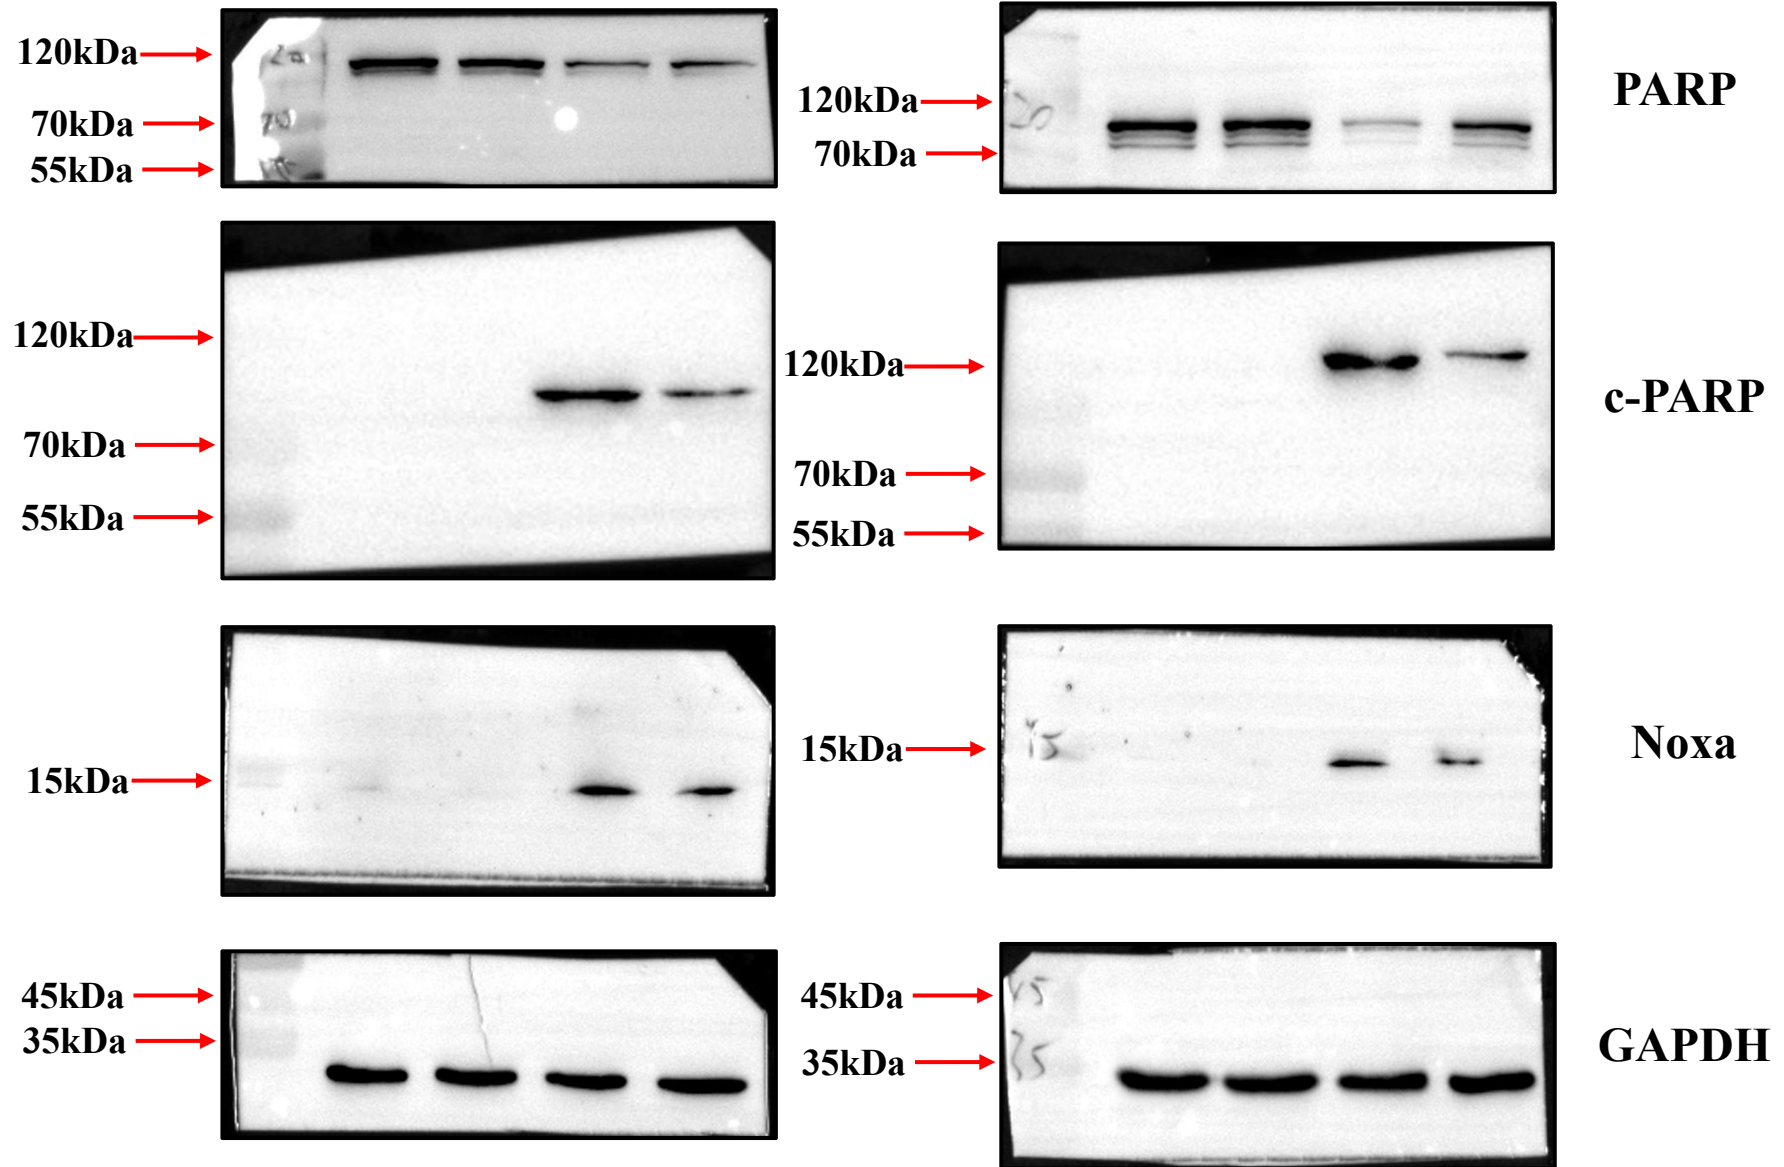

**Figure5-B**

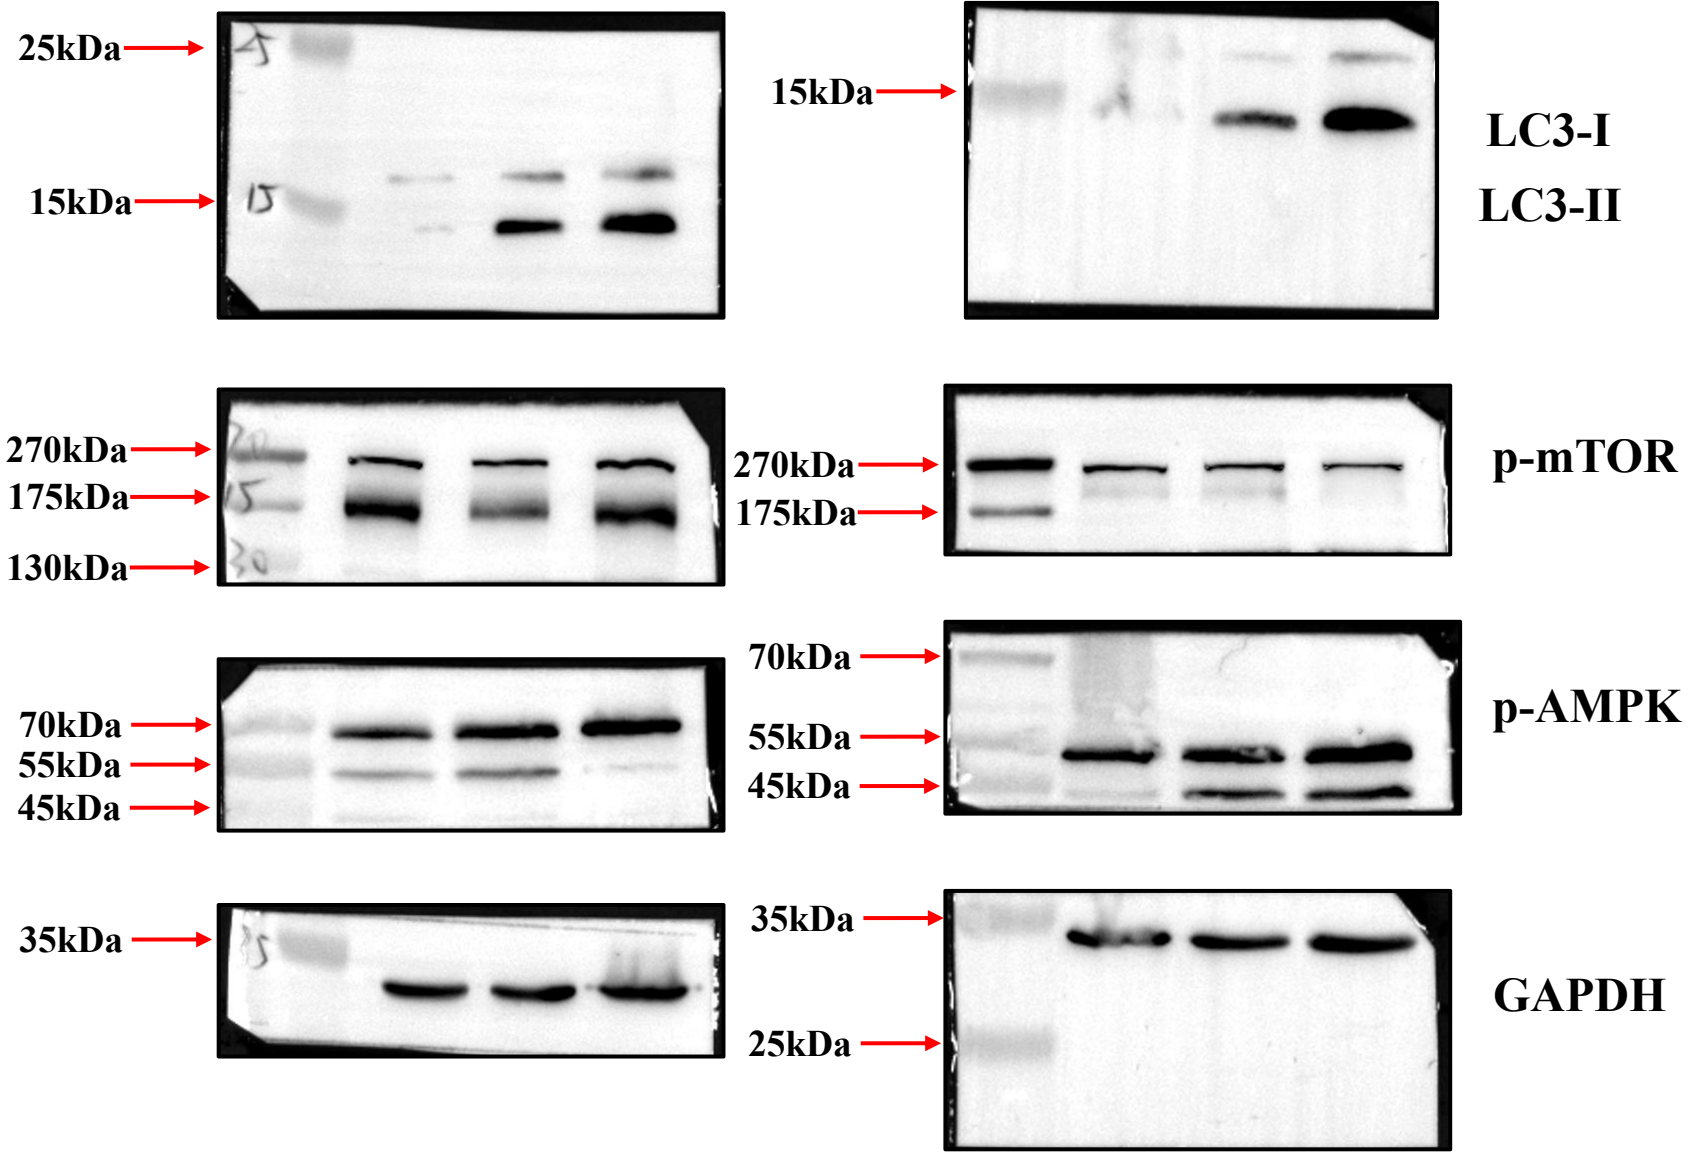

**Figure5-F**

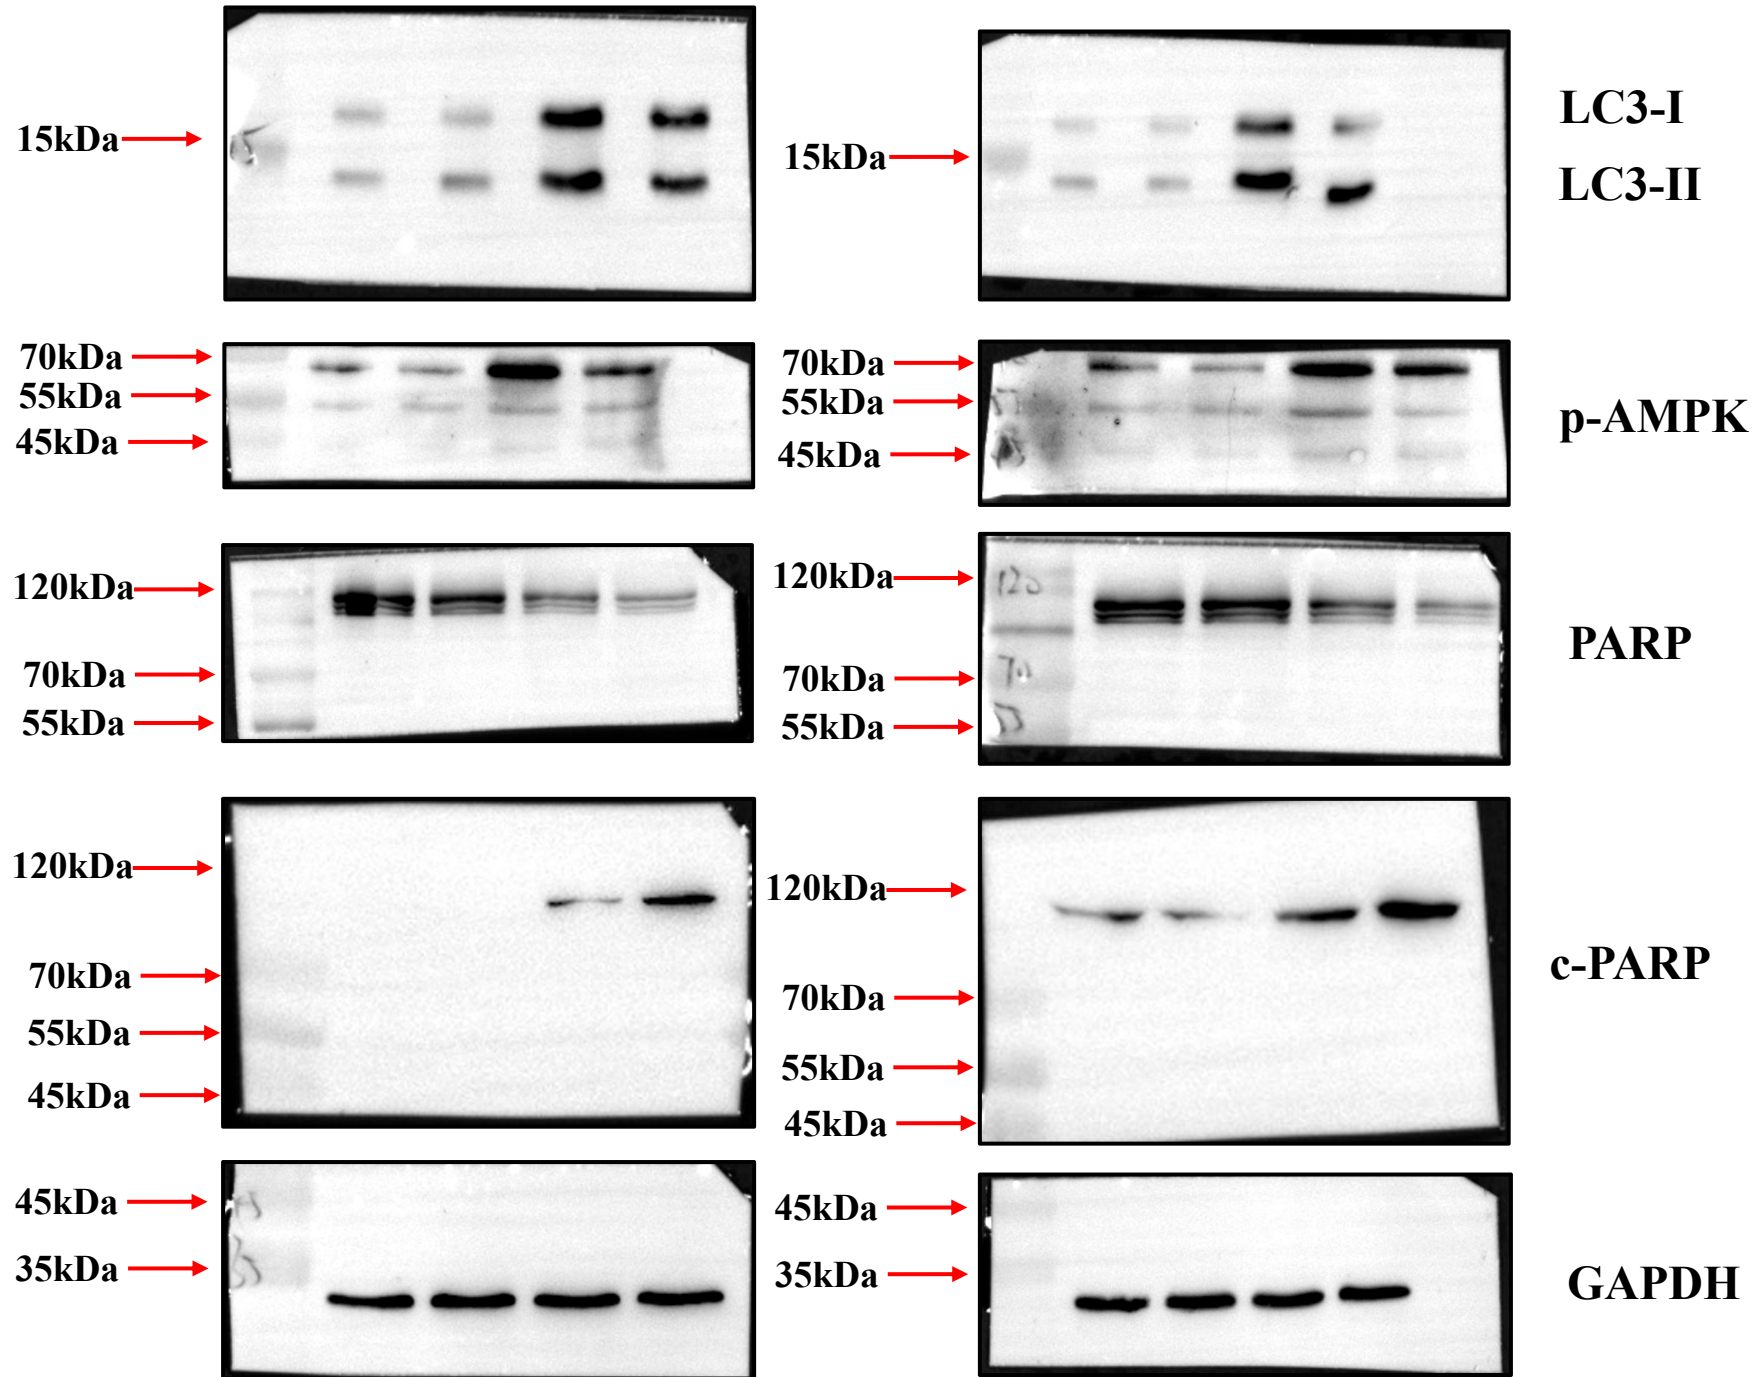

**Figure6-C**

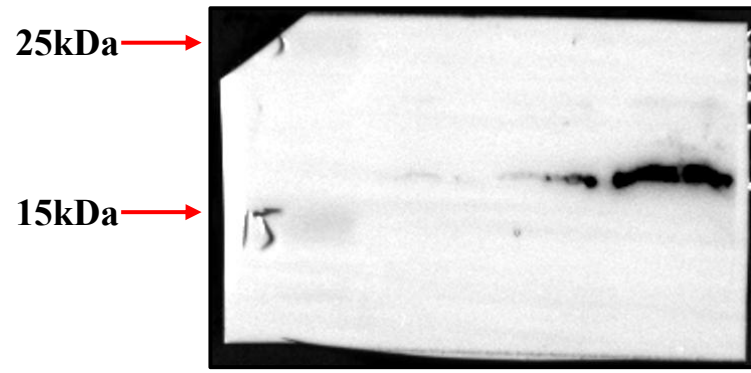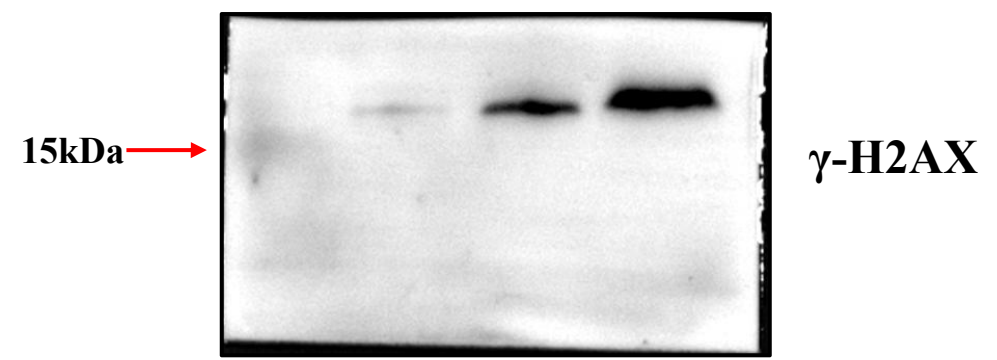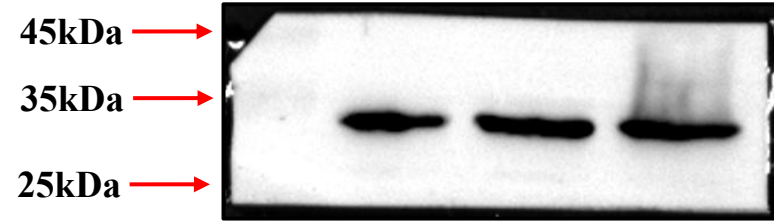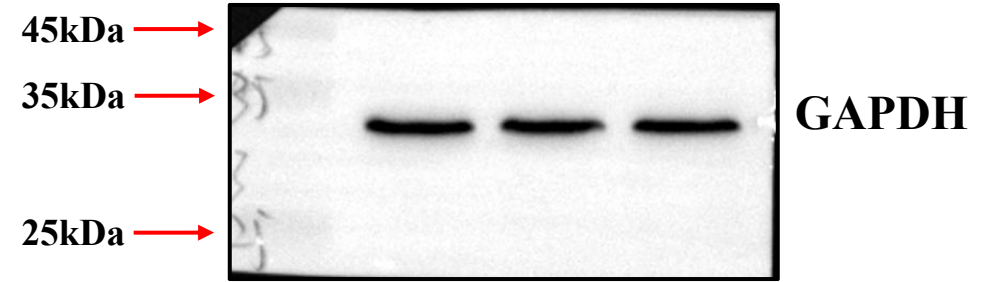

**Figure6-D**

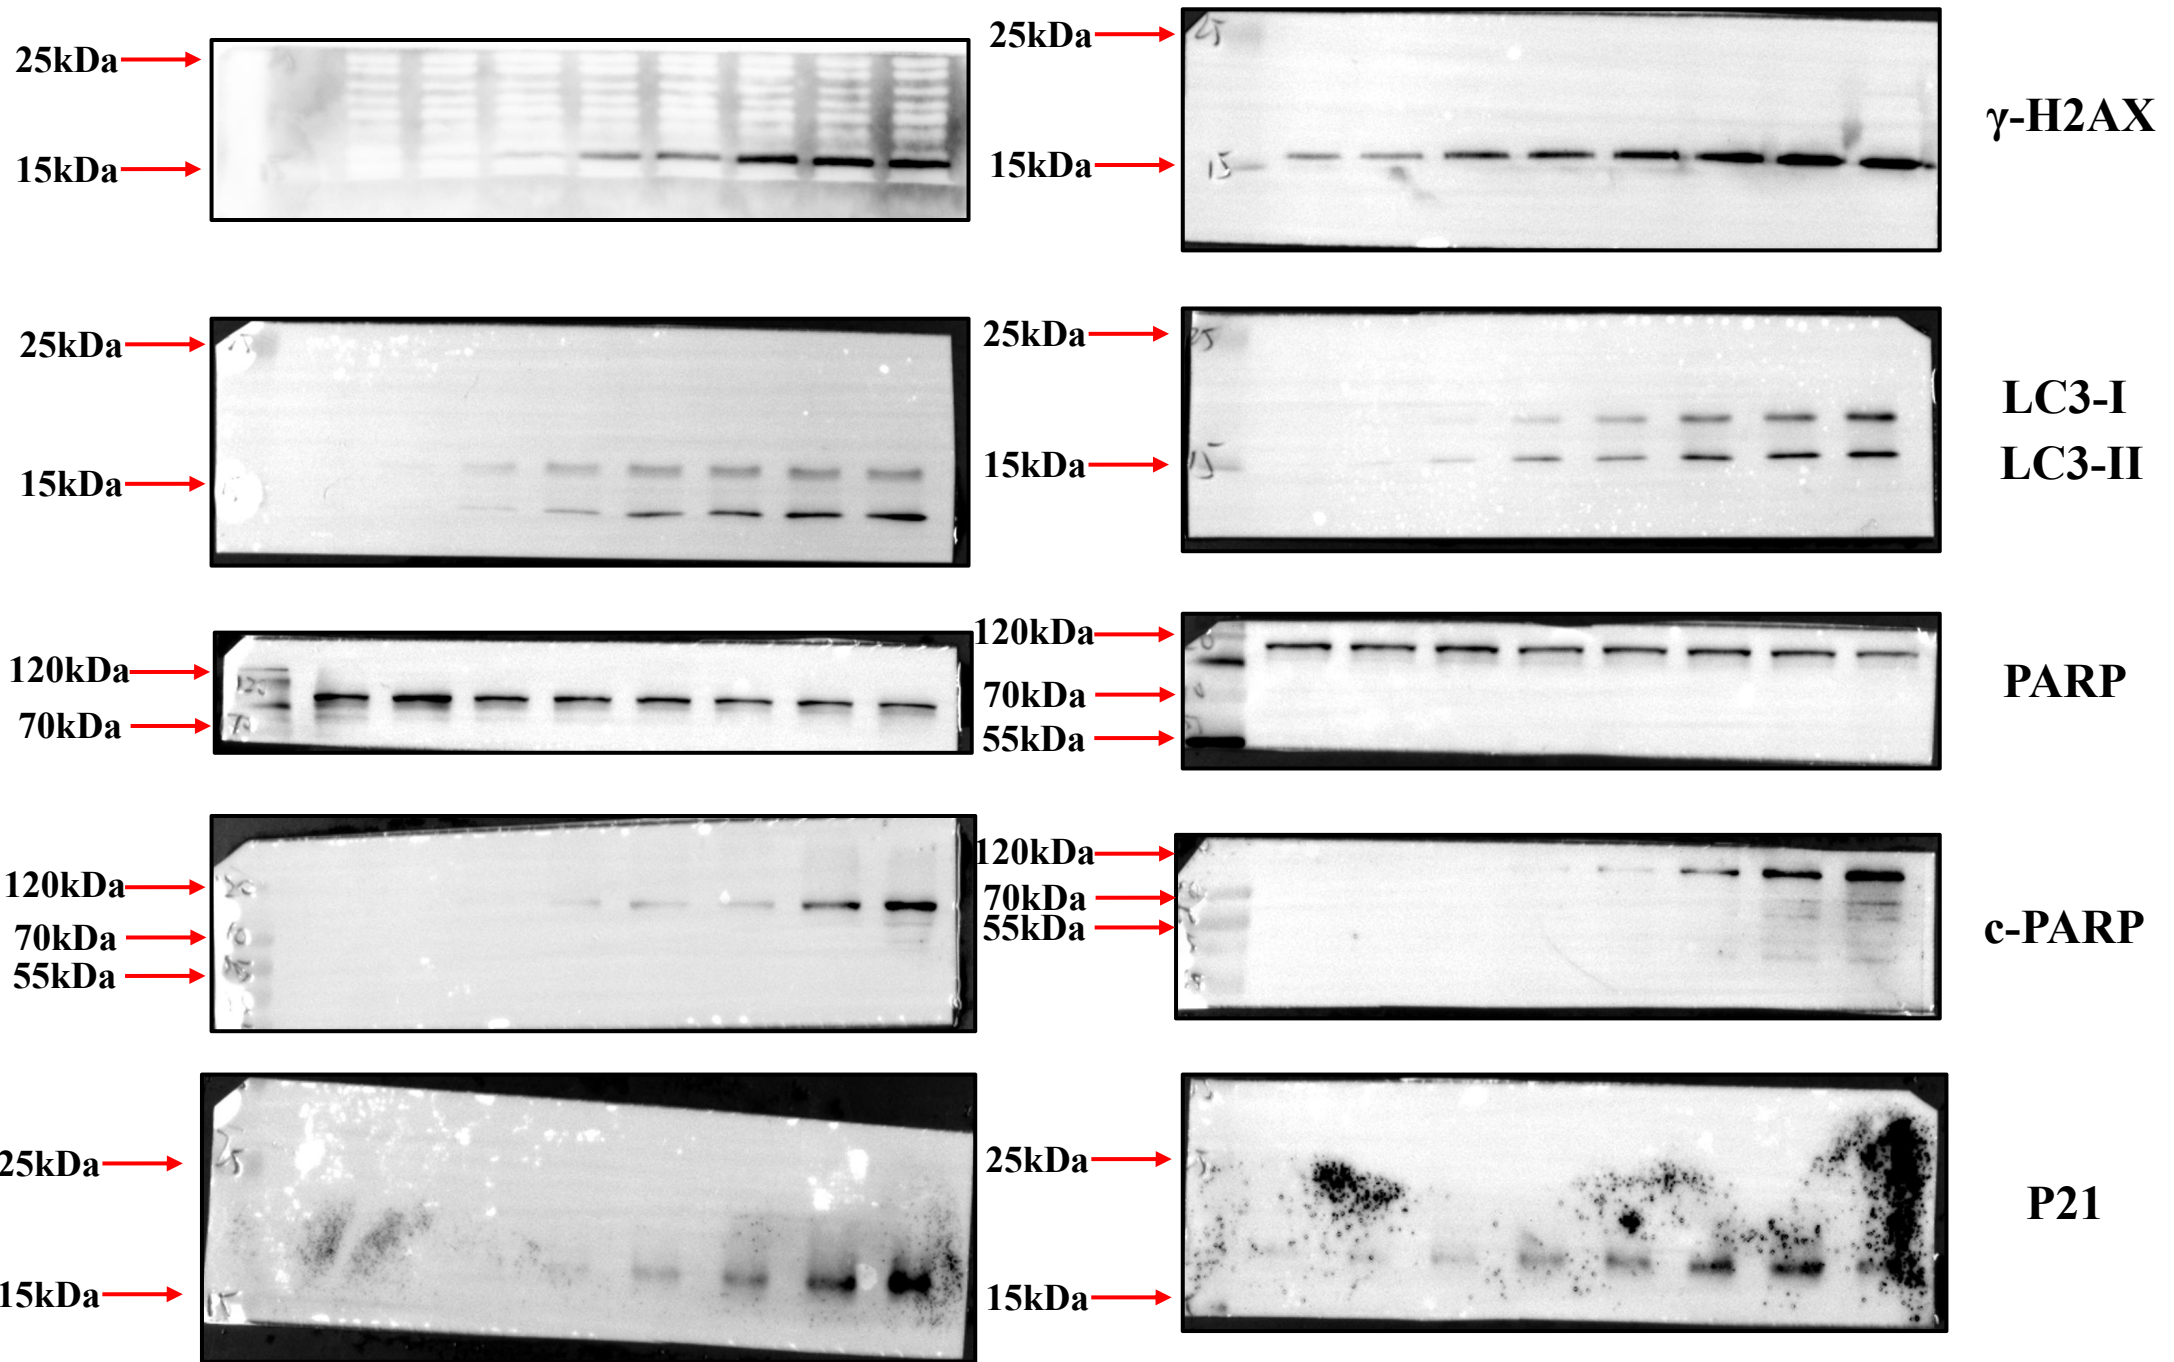

**Figure6-D**

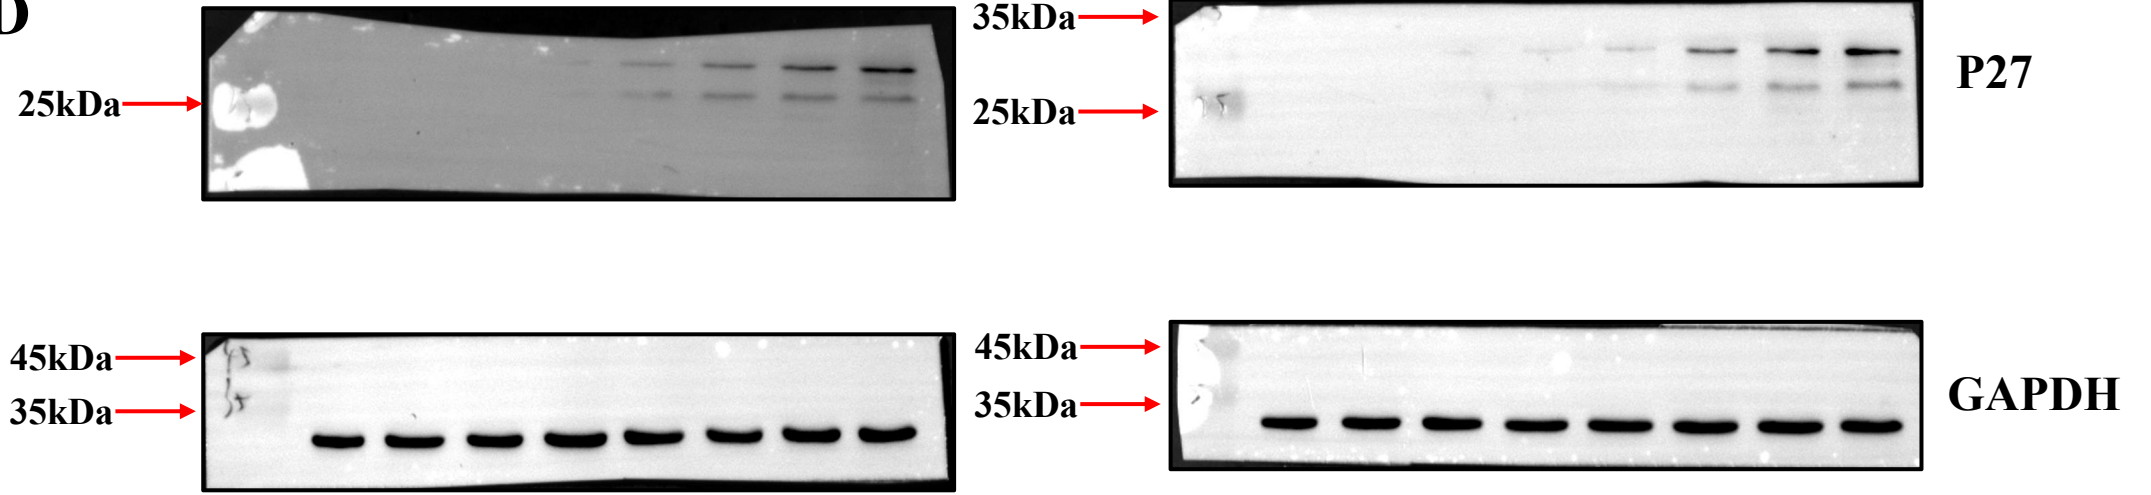

**Figure7-C**

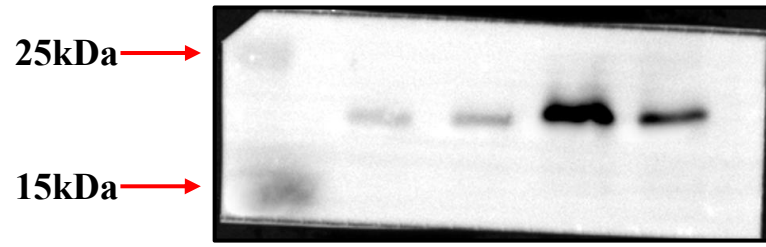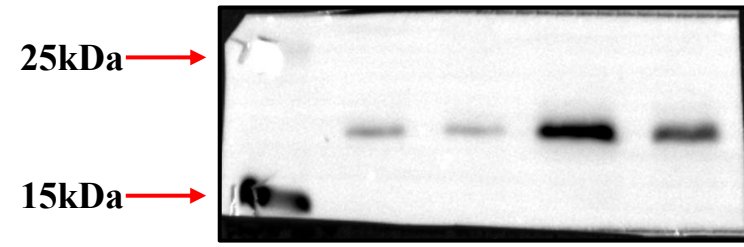

**P21**

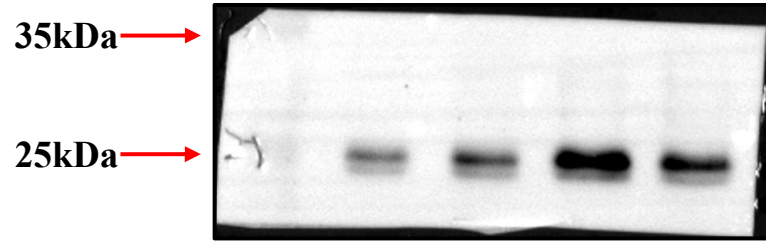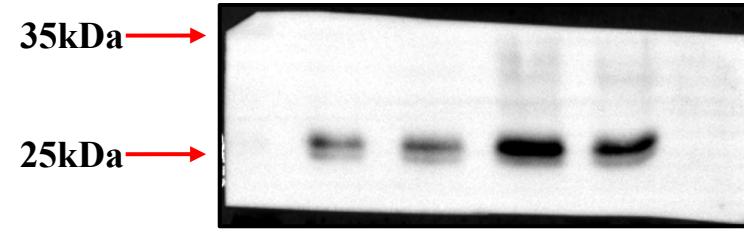

**P27**

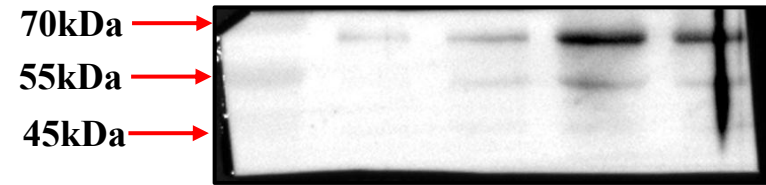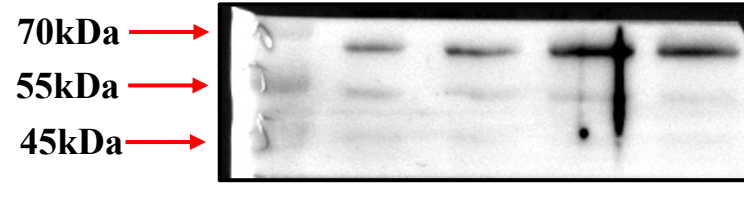

**p-AMPK**

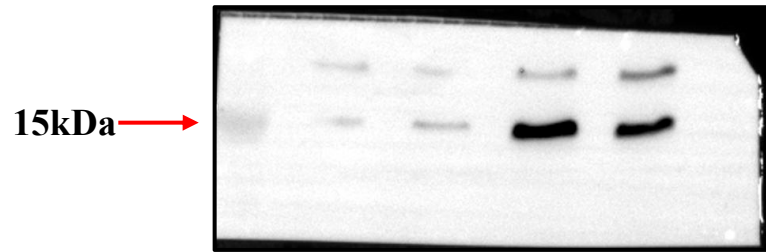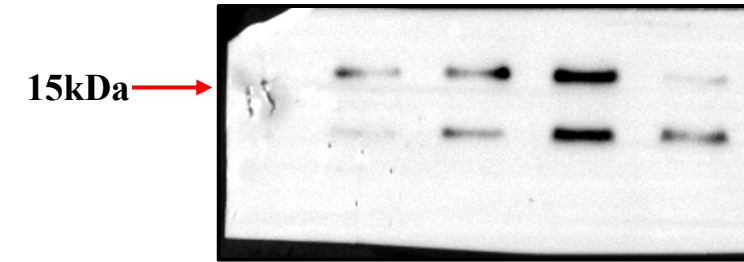

**LC3-I**  
**LC3-II**

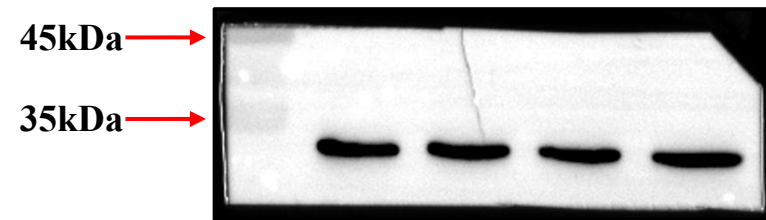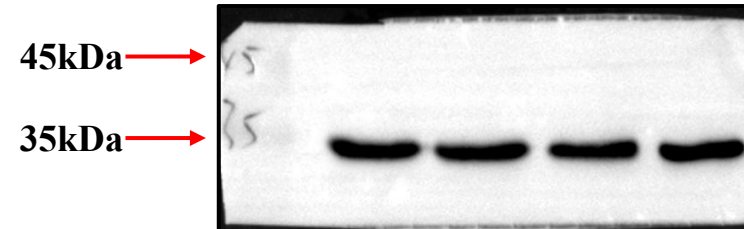

**GAPDH**
