# Supplementary material for: EOAI, a ubiquitin-specific peptidase 5 inhibitor, prevents non-small cell lung cancer progression by inducing DNA damage
Source: Springer Nature journal article supplement (doi:10.1186/s12885-023-10506-0), 2023-01-07

### A549 DMSO Gate1

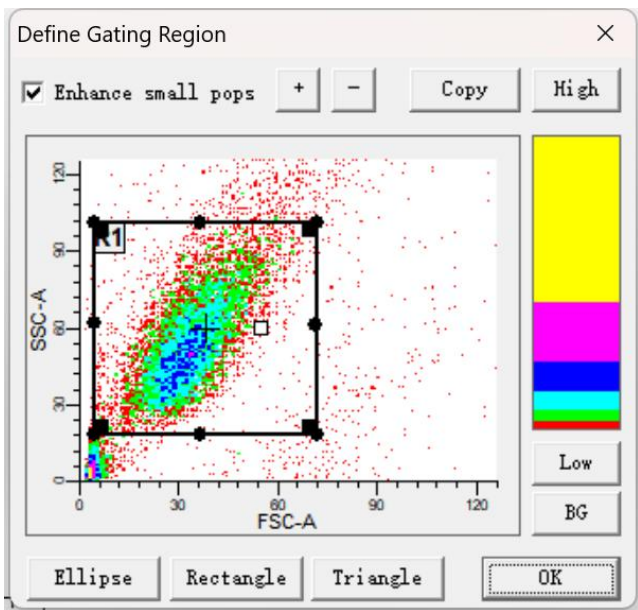

### A549 DMSO Gate2

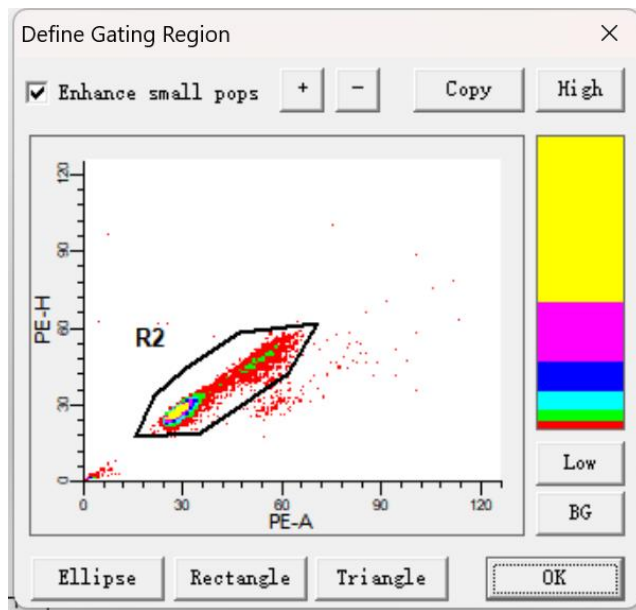

### A549 2μM Gate1

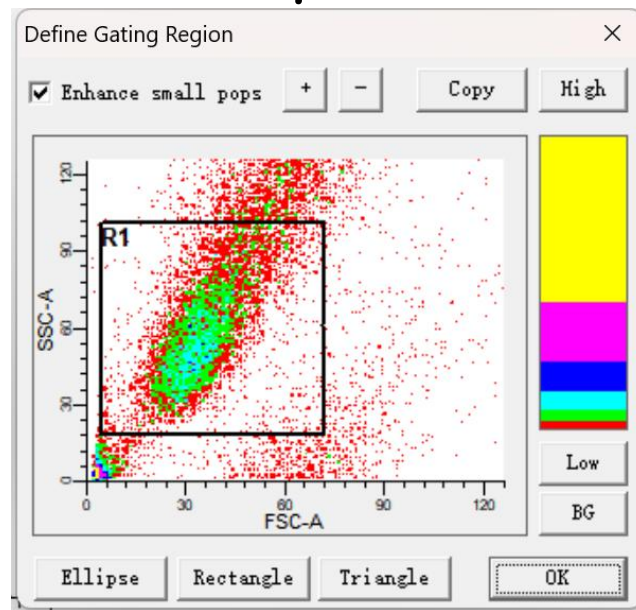

### A549 2μM Gate2

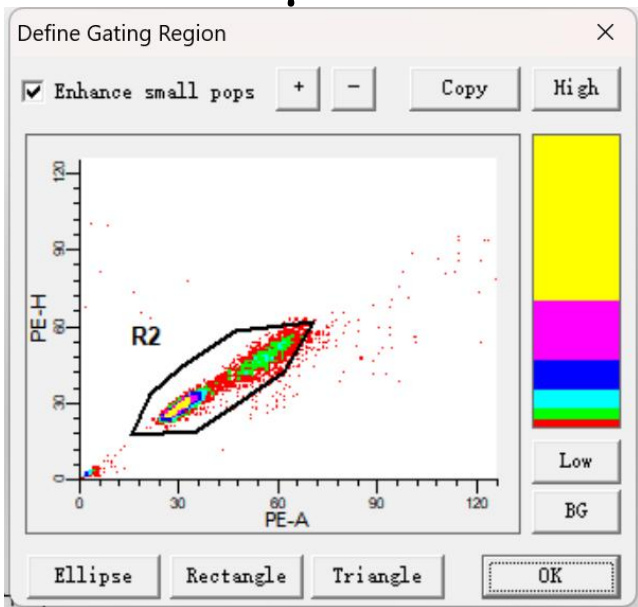

### A549 4μM Gate1

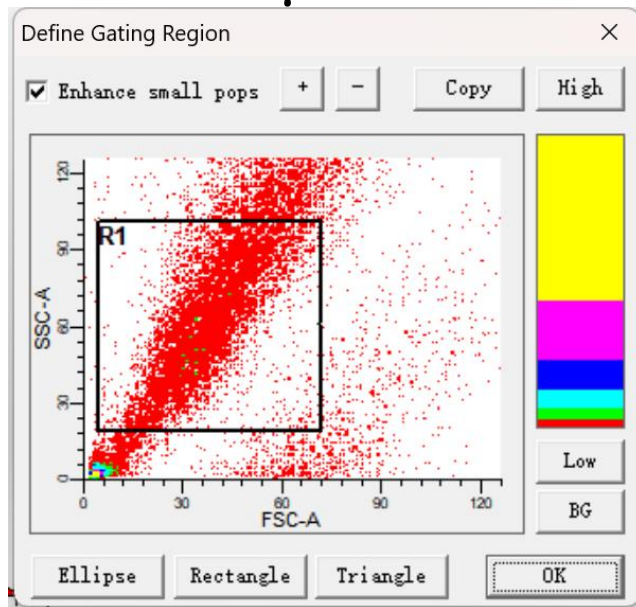

### A549 4μM Gate2

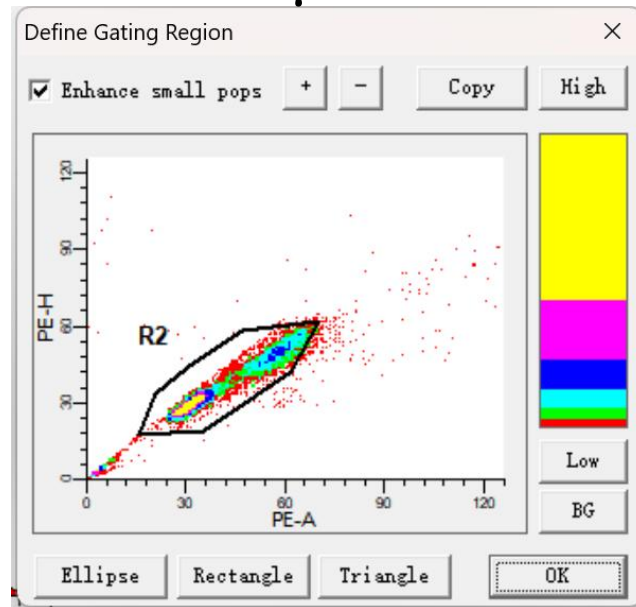

### H460 DMSO Gate1

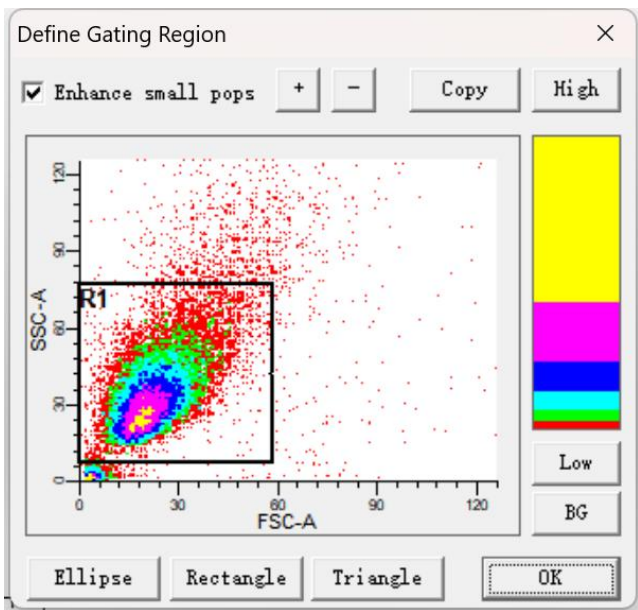

### H460 DMSO Gate2

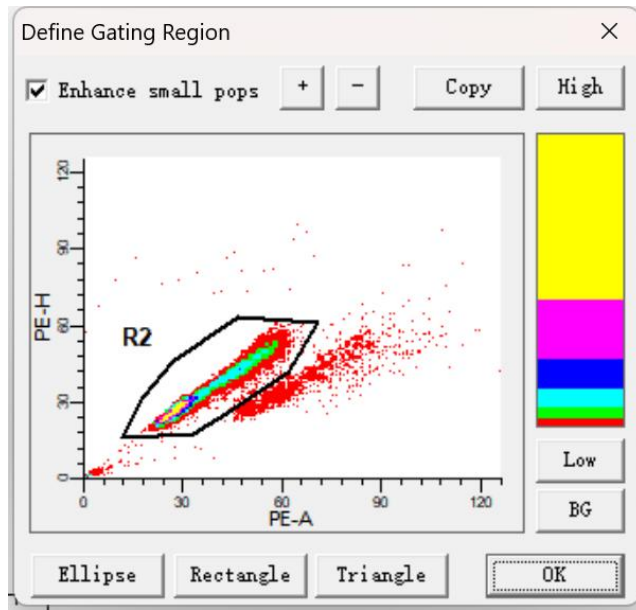

### H460 2 $\mu$ M Gate1

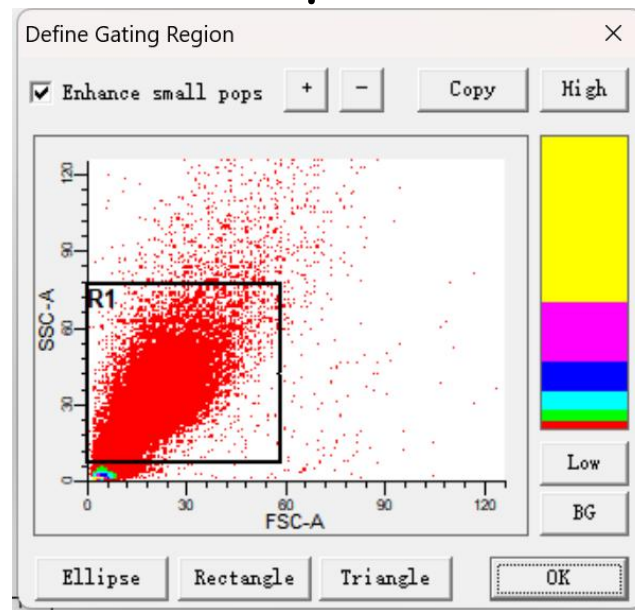

### H460 2 $\mu$ M Gate2

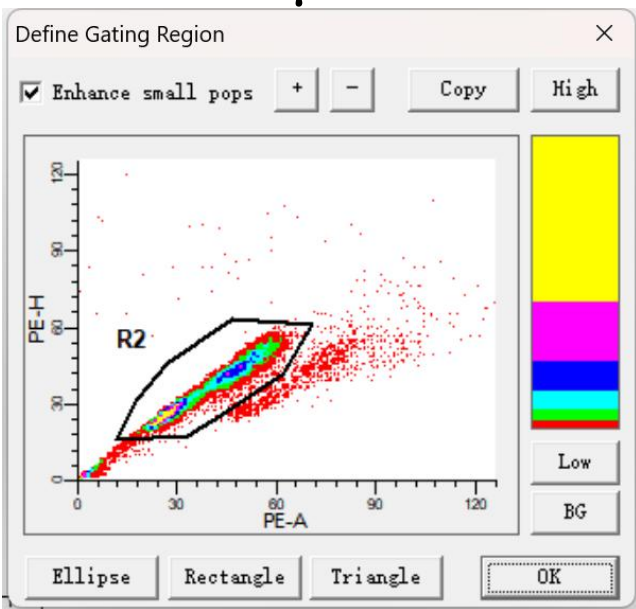

### H460 4 $\mu$ M Gate1

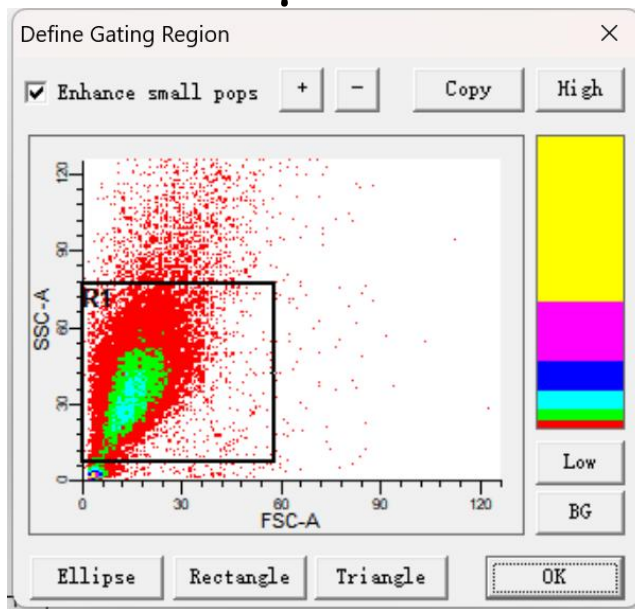

### H460 4 $\mu$ M Gate2

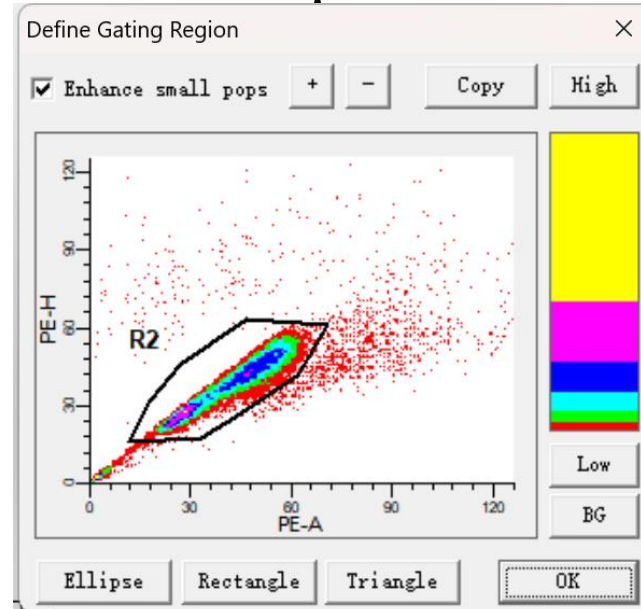

Supplement: MOESM2 [file 23899116]
